# Supplementary material for: Autosomal dominant transmission of complicated hereditary spastic paraplegia due to a dominant negative mutation of KIF1A, SPG30 gene
Source: PubMed Central journal article supplement (PMC5624960; doi:10.1038/s41598-017-12999-9), 2017-10-02

# **Autosomal dominant transmission of complicated hereditary spastic paraplegia due to a dominant negative mutation of *KIF1A*, SPG30 gene**

Chong Kun Cheon<sup>1,2\*</sup>, So-Hee Lim<sup>3</sup>, Yoo-Mi Kim<sup>1</sup>, Doyoun Kim<sup>4</sup>, Na-Yoon Lee<sup>3</sup>, Tae-Sung Yoon<sup>3</sup>, Nam-Soon Kim<sup>3</sup>, Eunjoon Kim<sup>4,5</sup> & Jae-Ran Lee<sup>3\*</sup>

<sup>1</sup>Department of Pediatrics, Pusan National University Children's Hospital, Yangsan, Korea. <sup>2</sup>Research Institute for Convergence of Biomedical Science and Technology, Pusan National University Yangsan Hospital, Yangsan, Korea. <sup>3</sup>Rare Disease Research Center, Korea Research Institute of Bioscience and Biotechnology, Daejeon, Korea. <sup>4</sup>Center for Synaptic Brain Dysfunctions, Institute for Basic Science (IBS), Daejeon, Korea. <sup>5</sup>Department of Biological Sciences, Korea Advanced Institute of Science and Technology, Daejeon, Korea.

**Figure S1. Expression of KIF1A-MD mutants is comparable to WT KIF1A-MD.** (A) WT KIF1A-MD and KIF1A-MD mutants were transfected in HEK293 cells using the calcium phosphate method and the expression of the KIF1A-MD proteins was assessed in the total cell lysates by Western blotting using an anti-EGFP antibody after 2 days of transfection. The levels of expressions of KIF1A-MD mutants were comparable to WT KIF1A-MD. (B) The expression of WT KIF1A-MD and KIF1A-MD mutants were confirmed by immunocytochemistry using EGFP antibody in transfected COS1 cells as described in the methods. KIF1A-MD mutants as well as WT KIF1A-MD were evenly distributed throughout the whole cell body.

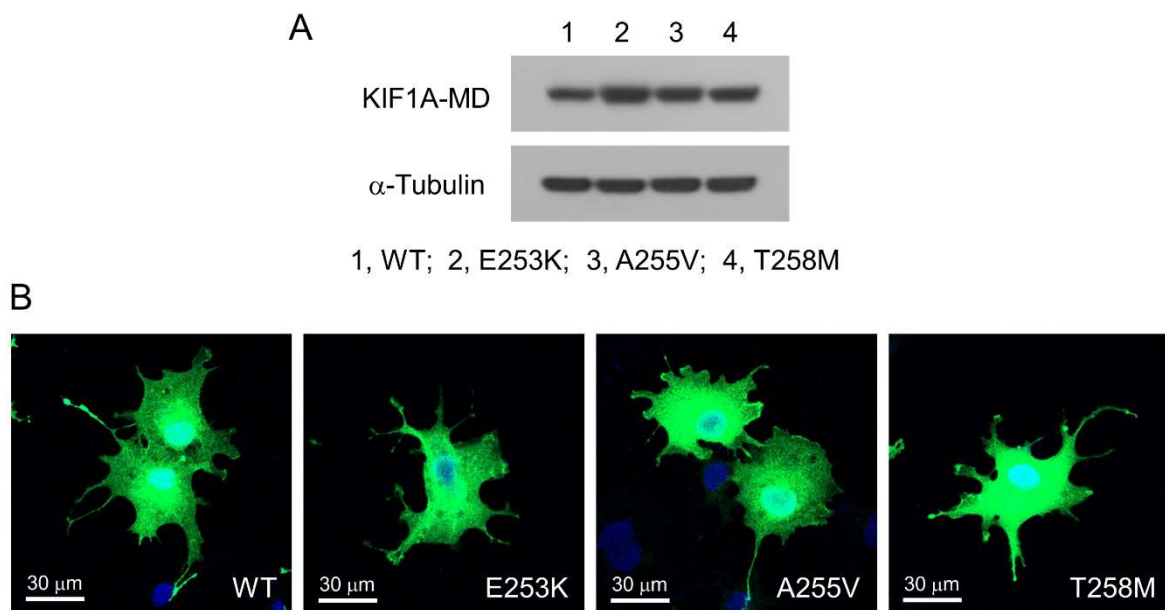

Supplement: 41598_2017_12999_MOESM1_ESM.pdf [file 41598_2017_12999_MOESM1_ESM.pdf]
